# Supplementary material for: Neurotoxicity of Benzotriazole Ultraviolet Stabilizers in Teleost Fishes: A Review
Source: MDPI journal article supplement (doi:10.3390/toxics12020125), 2024-02-02
Supplement: s1 [file s1]

Table S3: presents data for marine invertebrates

| Reference | Chemicals                                                                   | Dose                 | Tested organisms           | Life stage | Exposure period | Endpoint                                   | Results                                                                                                                             |
|-----------|-----------------------------------------------------------------------------|----------------------|----------------------------|------------|-----------------|--------------------------------------------|-------------------------------------------------------------------------------------------------------------------------------------|
| [1]       | UV-234,UV-326,UV-329,UV-P                                                   | 0.1,1,10µg/L         | <i>Corbicula fluminea</i>  | Adult      | 21d             | Filtering rate; Ach content; AchE activity | Filtering rate were increased, and ACh content as well as AChE activity were increased in <i>C. fluminea</i> from all BUVSs groups. |
| [2]       | benzophenone-3 (BP3); 3-(4-methylbenzylidene)camph(4-MBC); octocrylene (OC) | 0.09,1.12,14.13mg/kg | <i>Chironomus riparius</i> | larvae     | 2d              | AChE activity                              | <i>C. riparius</i> larvae exposed to 0.09 mg/kg 4-MBC showed a decrease in AChE activity                                            |
|           |                                                                             |                      |                            |            |                 |                                            |                                                                                                                                     |

1. Zhang, J., et al., *Comparative toxicogenomics of benzotriazole ultraviolet stabilizers at environmental concentrations in Asian clam* (*Corbicula fluminea*): *Insight into molecular networks and behavior*. Journal of Hazardous Materials, 2023. **447**.
2. Campos, D., et al., *Toxicity of organic UV-filters to the aquatic midge* *Chironomus riparius*. Ecotoxicology and Environmental Safety, 2017. **143**: p. 210-216.

Studies have shown that benzotriazole cause significant changes in the expression levels of VTG, CYP1A1, and CYP19a in *Oryzias melastigma* at environmentally relevant concentrations (0.01 mg/L) detected in the aquatic environment<sup>[3]</sup>. The EC50 value of BT for *Phaeodactylum tricornutum* is 41mg/L<sup>[4]</sup>. UV-327 was exposed to sea urchin larvae for 4 days, and the growth was significantly inhibited at the level of 5 mg/L<sup>[5]</sup>. Toxicities of BP-1 , BP-3 , BP-4 and BP-8 to larvae and adults of two coral species, *Pocillopora damicornis* and *Seriatopora caliendrum*, were assessed at concentrations ranging from 0.1 – 1000 µ g/L. The EC50 value of BP-1 for larva of

Seriatopora caliendrum De-settlement is 184.13 µg/L, BP-3 at 1000 µg/L can cause 95% of the larvae of Seriatopora caliendrum bleached and 50% of the nubbin corals bleached. BP-8 at 10 µg/L results in 83.3% Seriatopora caliendrum polyps were retracted, and BP-8 at 1000 µg/L results in 100% Pocillopora damicornis corals polyps were retracted<sup>[6]</sup>.

1. Zhang, J., et al., *Comparative toxicogenomics of benzotriazole ultraviolet stabilizers at environmental concentrations in Asian clam* (*Corbicula fluminea*): *Insight into molecular networks and behavior*. Journal of Hazardous Materials, 2023. **447**.
2. Campos, D., et al., *Toxicity of organic UV-filters to the aquatic midge* *Chironomus riparius*. Ecotoxicology and Environmental Safety, 2017. **143**: p. 210-216.
3. He, T.T., et al., *Estrogenic potential of benzotriazole on marine medaka* (*Oryzias melastigma*). Ecotoxicology and Environmental Safety, 2012. **80**: p. 327-332.
4. Canova, L., et al., *A Comparative Test on the Sensitivity of Freshwater and Marine Microalgae to Benzo-Sulfonamides, -Thiazoles and -Triazoles*. Applied Sciences-Basel, 2021. **11**(17).
5. Shore, E.A., et al., *Four plastic additives reduce larval growth and survival in the sea urchin Strongylocentrotus purpuratus*. Marine Pollution Bulletin, 2022. **175**.
6. He, T.T., et al., *Comparative toxicities of four benzophenone ultraviolet filters to two life stages of two coral species*. Science of the Total Environment, 2019. **651**: p. 2391-2399.
