# Supplementary material for: Neurotoxicity of Benzotriazole Ultraviolet Stabilizers in Teleost Fishes: A Review
Source: MDPI journal article supplement (doi:10.3390/toxics12020125), 2024-02-02
Supplement: s1 [file s1]

| <b>Table S2. Occurrence of ultraviolet stabilizers in aquatic environments.</b> |                        |                    |                                           |                  |
|---------------------------------------------------------------------------------|------------------------|--------------------|-------------------------------------------|------------------|
| <b>Composition</b>                                                              | <b>Sample location</b> | <b>Sample type</b> | <b>Concentrations<br/>Median (range)</b>  | <b>Reference</b> |
| <b>BUVSs</b>                                                                    | Spain                  | seawater           | 1095.39 ng/L (3.65-2998.51 ng/L )         | [1-5]            |
|                                                                                 |                        | Sewage             | 184.93 ng/L (12.8-445.7 ng/L )            | [3, 4, 6]        |
|                                                                                 |                        | Groundwater        | 1742.5 ng/L (ND-3290 ng/L)                | [5]              |
|                                                                                 |                        | Sediments          | 12329.58 ng/g dw (10244.52-15158 ng/g dw) | [2]              |
|                                                                                 | China                  | Seawater           | 75.22 ng/L (10.73-281 ng/L )              | [7-12]           |
|                                                                                 |                        | Wastewater         | 109.19 ng/L (39.61-235.54 ng/L)           | [13]             |
|                                                                                 |                        | Sediment           | 6.91 ng/g dw (0.36-21.2 ng/g dw )         | [10, 14, 15]     |
|                                                                                 | Indian                 | Water              | 617.20 ng/L (5.5-3037.8 ng/L )            | [16-19]          |
|                                                                                 |                        | Sediment           | 3.5 ng/g dw (3.49-3.9 ng/g dw)            | [16]             |
|                                                                                 |                        | Sludge             | 70.4 ng/g dw (38.8-102 ng/g dw)           | [17]             |
|                                                                                 | Portugal               | water              | 5.2 ng/L                                  | [20]             |
|                                                                                 | Greece                 | water              | 580.15 ng/L                               | [21]             |
|                                                                                 | South Korea            | Seawater           | 5.14ng/L (4.73-8.6 ng/L)                  | [22]             |
|                                                                                 |                        | Sediment           | 1.56ng/L (0.581-6.62 ng/L)                | [22]             |
|                                                                                 | Canada                 | water              | 23.52 ng/L (0.452-86.35 ng/L)             | [23-25]          |
|                                                                                 |                        | Sediment           | 9 ng/L (ND-43 ng/L)                       | [23]             |
|                                                                                 | Norway                 | Sediment           | 23.2 ng/L (37.2-63.2 ng/L)                | [26]             |
|                                                                                 | Switzerland            | Surface water      | 464 ng/L (11-917 ng/L)                    | [27]             |
|                                                                                 |                        | Groundwater        | 46.5 ng/L (16-77 ng/L)                    | [27]             |
|                                                                                 | Tunisia                | Seawater           | 300.5 ng/L (47.1-1652 ng/L)               | [28]             |
|                                                                                 |                        | Sediments          | 2082 ng/g dw (587-4252 ng/g dw)           | [28]             |

|  |           |              |                                |      |
|--|-----------|--------------|--------------------------------|------|
|  | Australia | Ground water | 645.4 ng/L                     | [29] |
|  | Japan     | Sediment     | 15 ng/g dw (7.9-720 ng/g dw)   | [30] |
|  | German    | Sediment     | 50.08 ng/g dw                  | [31] |
|  | Brazil    | Sediment     | 79.11 ng/g dw (ND-630 ng/g dw) | [32] |

1. Garcia-Guerra, R.B., et al., *Rapid monitoring of residual UV-stabilizers in seawater samples from beaches using fabric phase sorptive extraction and UHPLC-MS/MS*. Chemosphere, 2016. **164**: p. 201-207.
2. Montesdeoca-Esponda, S., et al., *Monitoring and environmental risk assessment of benzotriazole UV stabilizers in the sewage and coastal environment of Gran Canaria (Canary Islands, Spain)*. Journal of Environmental Management, 2019. **233**: p. 567-575.
3. Montesdeoca-Esponda, S., et al., *Development of a sensitive determination method for benzotriazole UV stabilizers in environmental water samples with stir bar sorption extraction and liquid desorption prior to ultra-high performance liquid chromatography with tandem mass spectrometry*. Journal of Separation Science, 2013. **36**(13): p. 2168-2175.
4. Montesdeoca-Esponda, S., Z. Sosa-Ferrera, and J. Juan Santana-Rodriguez, *On-line solid-phase extraction coupled to ultra-performance liquid chromatography with tandem mass spectrometry detection for the determination of benzotriazole UV stabilizers in coastal marine and wastewater samples*. Analytical and Bioanalytical Chemistry, 2012. **403**(3): p. 867-876.
5. Serra-Roig, M.P., et al., *Occurrence, fate and risk assessment of personal care products in river-groundwater interface*. Science of The Total Environment, 2016. **568**: p. 829-837.
6. Montesdeoca-Esponda, S., et al., *Fabric phase sorptive extraction followed by UHPLC-MS/MS for the analysis of benzotriazole UV stabilizers in sewage samples*. Analytical and Bioanalytical Chemistry, 2015. **407**(26): p. 8137-8150.
7. Pei, J., et al., *Occurrence, bioaccumulation and ecological risk of organic ultraviolet absorbers in multiple coastal and offshore coral communities of the South China Sea*. Science of the Total Environment, 2023. **868**.
8. Song, S., et al., *Occurrence and removal of benzotriazole ultraviolet stabilizers in a wastewater treatment plant in China*. Environmental Science-Processes & Impacts, 2014. **16**(5): p. 1076-1082.
9. Zhao, M.-L., et al., *Simultaneous determination of benzothiazoles, benzotriazoles, and benzotriazole UV absorbers by solid-phase extraction-gas chromatography-mass spectrometry*. Environmental Science and Pollution Research, 2023.

10. Tang, Z., et al., *Occurrence, distribution and ecological risk of ultraviolet absorbents in water and sediment from Lake Chaohu and its inflowing rivers, China*. Ecotoxicology and Environmental Safety, 2018. **164**: p. 540-547.
11. Hu, L.-X., et al., *Continuous input of organic ultraviolet filters and benzothiazoles threatens the surface water and sediment of two major rivers in the Pearl River Basin*. Science of the Total Environment, 2021. **798**.
12. Zhang, Z.-Y., et al., *Flower-like molybdenum disulfide/cobalt ferrite composite for the extraction of benzotriazole UV stabilizers in environmental samples*. Microchimica Acta, 2023. **190**(2).
13. Zhao, X., et al., *Occurrence and fate of benzotriazoles UV filters in a typical residential wastewater treatment plant in Harbin, China*. Environmental Pollution, 2017. **227**: p. 215-222.
14. Apel, C., J. Tang, and R. Ebinghaus, *Environmental occurrence and distribution of organic UV stabilizers and UV filters in the sediment of Chinese Bohai and Yellow Seas*. Environmental Pollution, 2018. **235**: p. 85-94.
15. Li, Y., et al., *Occurrence and distribution of organic ultraviolet absorbents in sediments from small urban rivers, Tianjin, China: Implications for risk management*. Ecotoxicology and Environmental Safety, 2022. **230**.
16. Vimalkumar, K., et al., *Occurrence of triclocarban and benzotriazole ultraviolet stabilizers in water, sediment, and fish from Indian rivers*. Science of the Total Environment, 2018. **625**: p. 1351-1360.
17. Karthikraj, R. and K. Kannan, *Mass loading and removal of benzotriazoles, benzothiazoles, benzophenones, and bisphenols in Indian sewage treatment plants*. Chemosphere, 2017. **181**: p. 216-223.
18. Vimalkumar, K., et al., *Screening of antimicrobials, fragrances, UV stabilizers, plasticizers and preservatives in sewage treatment plants (STPs) and their risk assessment in India*. Chemosphere, 2022. **308**.
19. Khare, A., et al., *Occurrence, spatio-temporal variation and ecological risk assessment of benzotriazole ultraviolet stabilizers (BUVs) in water and sediment of rivers in central India*. The Science of the total environment, 2023: p. 163381-163381.
20. Carpinteiro, I., et al., *Combining stir-bar sorptive extraction and large volume injection-gas chromatography-mass spectrometry for the determination of benzotriazole UV stabilizers in wastewater matrices*. Journal of Separation Science, 2012. **35**(3): p. 459-467.
21. Asimakopoulou, A.G., et al., *Occurrence and removal efficiencies of benzotriazoles and benzothiazoles in a wastewater treatment plant in Greece*. Science of the Total Environment, 2013. **452**: p. 163-171.
22. Wang, W., I.-S. Lee, and J.-E. Oh, *Specific-accumulation and trophic transfer of UV filters and stabilizers in marine food web*. Science of the Total Environment, 2022. **825**.

23. Dalpe Castilloux, A., et al., *Distribution and Fate of Ultraviolet Absorbents and Industrial Antioxidants in the St. Lawrence River, Quebec, Canada*. Environmental Science & Technology, 2022. **56**(8): p. 5009-5019.
24. Lu, Z., et al., *Occurrence and fate of substituted diphenylamine antioxidants and benzotriazole UV stabilizers in various Canadian wastewater treatment processes*. Water Research, 2017. **124**: p. 158-166.
25. Lu, Z., et al., *Distribution, Partitioning and Bioaccumulation of Substituted Diphenylamine Antioxidants and Benzotriazole UV Stabilizers in an Urban Creek in Canada*. Environmental Science & Technology, 2016. **50**(17): p. 9089-9097.
26. Langford, K.H., et al., *Environmental occurrence and risk of organic UV filters and stabilizers in multiple matrices in Norway*. Environment International, 2015. **80**: p. 1-7.
27. Kahle, M., et al., *HYDROPHILIC ANTHROPOGENIC MARKERS FOR QUANTIFICATION OF WASTEWATER CONTAMINATION IN GROUND- AND SURFACE WATERS*. Environmental Toxicology and Chemistry, 2009. **28**(12): p. 2528-2536.
28. Fenni, F., et al., *Contaminants of emerging concern in marine areas: First evidence of UV filters and paraben preservatives in seawater and sediment on the eastern coast of Tunisia*. Environmental Pollution, 2022. **309**.
29. Liu, Y.-S., et al., *Simultaneous determination of benzotriazoles and ultraviolet filters in ground water, effluent and biosolid samples using gas chromatography-tandem mass spectrometry*. Journal of Chromatography A, 2011. **1218**(31): p. 5328-5335.
30. Nakata, H., S. Murata, and J. Filatreau, *Occurrence and Concentrations of Benzotriazole UV Stabilizers in Marine Organisms and Sediments from the Ariake Sea, Japan*. Environmental Science & Technology, 2009. **43**(18): p. 6920-6926.
31. Wick, A., et al., *Benzotriazole UV stabilizers in sediments, suspended particulate matter and fish of German rivers: New insights into occurrence, time trends and persistency*. Environmental Pollution, 2016. **212**: p. 401-412.
32. Mizukawa, A., et al., *Sediments as a sink for UV filters and benzotriazoles: the case study of Upper Iguacu watershed, Curitiba (Brazil)*. Environmental Science and Pollution Research, 2017. **24**(22): p. 18284-18294.
