# Supplementary material for: Neurotoxicity of Benzotriazole Ultraviolet Stabilizers in Teleost Fishes: A Review
Source: Toxics. 2024 Feb 2;12(2):125. doi: 10.3390/toxics12020125 (PMC10891865; doi:10.3390/toxics12020125)
Supplement: Supplementary file 1 [file toxics-12-00125-s001.zip]

Archive with 4 entries (4 files):
- Suppl. Data S1. Abbreviations.csv
- Table S1.pdf
- Table S2.pdf
- Table S3.pdf
