# Supplementary material for: Neurotoxicity of Benzotriazole Ultraviolet Stabilizers in Teleost Fishes: A Review
Source: Toxics. 2024 Feb 2;12(2):125. doi: 10.3390/toxics12020125 (PMC10891865; doi:10.3390/toxics12020125)
Supplement: Supplementary file 1 [file toxics-12-00125-s001.zip › Suppl. Data S1. Abbreviations.csv]

Name	Description	Object Type	Total Connectivity
CYP1A		Functional Class	1568
unspecific monooxygenase		Functional Class	2590
vitellogenin		Functional Class	964
cytochrome P450		Functional Class	8824
neoplasm		Disease	48004
genotoxicity		Disease	3172
long-term complication		Disease	1780
endometrial carcinoma		Disease	5320
liver atrophy		Disease	101
tuberculosis		Disease	6611
toxicity		Disease	18299
melanoma		Disease	12778
hepatocellular carcinoma		Disease	20788
erythema		Disease	2149
carcinogenesis		Disease	16487
neurotoxicity		Disease	7995
malignant neoplasm		Disease	43887
PTK2	protein tyrosine kinase 2	Protein	9257
r_Gsta1	glutathione S-transferase alpha 1	Protein	23
PTPN1	protein tyrosine phosphatase non-receptor type 1	Protein	3812
PTGES	prostaglandin E synthase	Protein	5586
GNRH1	gonadotropin releasing hormone 1	Protein	4769
CTBP1	C-terminal binding protein 1	Protein	960
AHR	aryl hydrocarbon receptor	Protein	6392
CDH1	cadherin 1	Protein	11173
MGLL	monoglyceride lipase	Protein	1787
CDH2	cadherin 2	Protein	6320
PON1	paraoxonase 1	Protein	2134
CDK2	cyclin dependent kinase 2	Protein	5289
ALB	albumin	Protein	11749
VIM	vimentin	Protein	8507
SLC9A1	solute carrier family 9 member A1	Protein	2475
CYP19A1	cytochrome P450 family 19 subfamily A member 1	Protein	6156
casein kinase II		Complex	2802
ozone		Small Molecule	2223
chloroform		Small Molecule	755
Na2SO4		Small Molecule	219
hydroxyl radicals		Small Molecule	1934
silver nanoparticles		Small Molecule	2412
Cd2+		Small Molecule	5674
chlorine		Small Molecule	1074
benzotriazole derivatives		Small Molecule	9
benzotriazole		Small Molecule	65
peroxymonosulfate		Small Molecule	44
West Nile virus		Virus	1065
Japanese encephalitis virus		Virus	1000
hepatitis C virus		Virus	4762
HIV-1		Virus	5797
UV exposure		Treatment	1483
ishikawa	endometrial cancer cell line	Cell	901
foam cell		Cell	2031
HEC 1B	adenocarcinoma cell line	Cell	269
molecular response		Clinical Parameter	692
survival rate		Clinical Parameter	5975
inflammatory response		Cell Process	13659
life span		Cell Process	6459
reproduction		Cell Process	3694
cell invasion		Cell Process	14217
membrane damage		Cell Process	2247
cell proliferation		Cell Process	34889
foam cell formation		Cell Process	1344
behavior		Cell Process	16806
platelet aggregation		Cell Process	4624
cell migration		Cell Process	19317
chemotaxis		Cell Process	5683
oxidative stress		Cell Process	16125
DNA recombination		Cell Process	3319
mitochondria		Cell Object	13408
Candida albicans		Pathogen	3467
Mycobacterium tuberculosis		Pathogen	3600
brain		Organ	30099
skin		Organ	17738
endocrine system		Organ	6652
